# Supplementary material for: Inflammatory responses induced by synergistic actions between nanoplastics and typical heavy metal ions in human cells
Source: Royal Society of Chemistry journal article supplement (doi:10.1039/d2en01097f), 2023-01-01
Supplement: d2en01097f1.pdf [file d2en01097f1.pdf]

Electronic Supplementary Information:

**Inflammatory response induced by synergistic interactions between  
nanoplastics and typical heavy metal ions in human cells**

Cong Li<sup>1</sup>, Xinxin Huang<sup>1</sup>, Weicui Min<sup>1,2</sup>, Huoqing Zhong<sup>1</sup>, Xiliang Yan<sup>1</sup>, Yan Gao<sup>1,2</sup>,  
Jianqiao Wang<sup>3</sup>, Hongyu Zhou<sup>1\*</sup>, Bing Yan<sup>1\*</sup>

<sup>1</sup> Institute of Environmental Research at Greater Bay, Key Laboratory for Water Quality and Conservation of the Pearl River Delta, Ministry of Education, Guangzhou University, Guangzhou, Guangdong, 510006, China

<sup>2</sup> School of Environmental Science and Engineering, Shandong University, Qingdao, Shandong, 250100, China

<sup>3</sup> School of Environmental Science and Engineering, Guangzhou University, Guangzhou, 510006, China

**\*Corresponding author**

Bing Yan (drbingyan@yahoo.com); Hongyu Zhou (hyzhou001@gzhu.edu.cn)

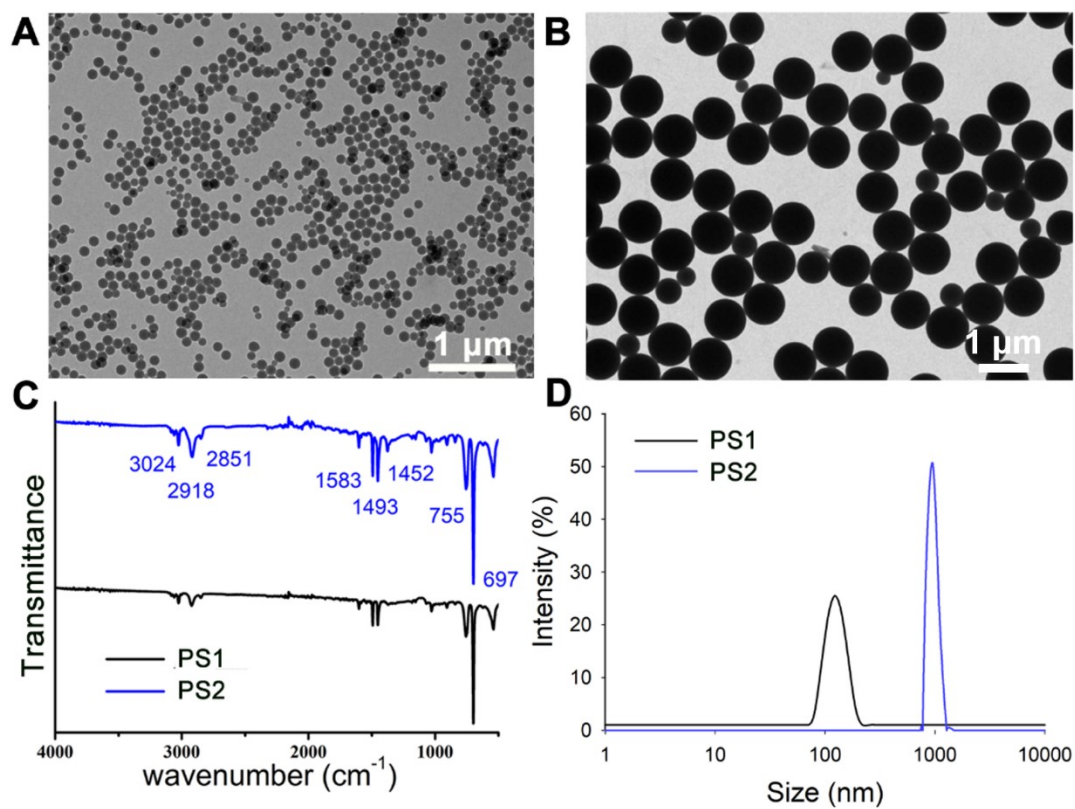

**Fig. S1.** Characterization of PS1 and PS2. (A-B) TEM images of PS1 and PS2; (C) FTIR spectra of PS1 and PS2; (D) Hydrodynamic diameters of PS1 and PS2 in deionized H<sub>2</sub>O.

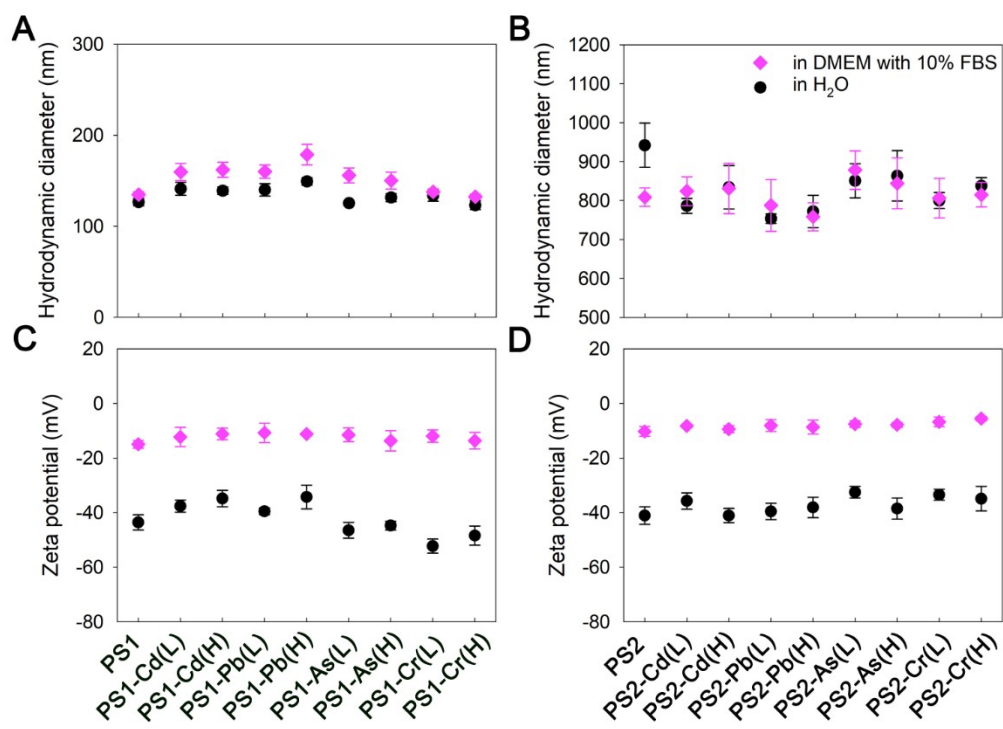

**Fig. S2.** Characterization of PS1-ions and PS2-ions. Hydrodynamic diameters of (A) PS1-ions and (B) PS2-ions in deionized H<sub>2</sub>O and DMEM with 10% FBS. Zeta potentials of (C) PS1-ions and (D) PS2-ions in deionized H<sub>2</sub>O and DMEM with 10% FBS. The concentration of PS is 100 µg/mL. (mean ± SD, n = 3).

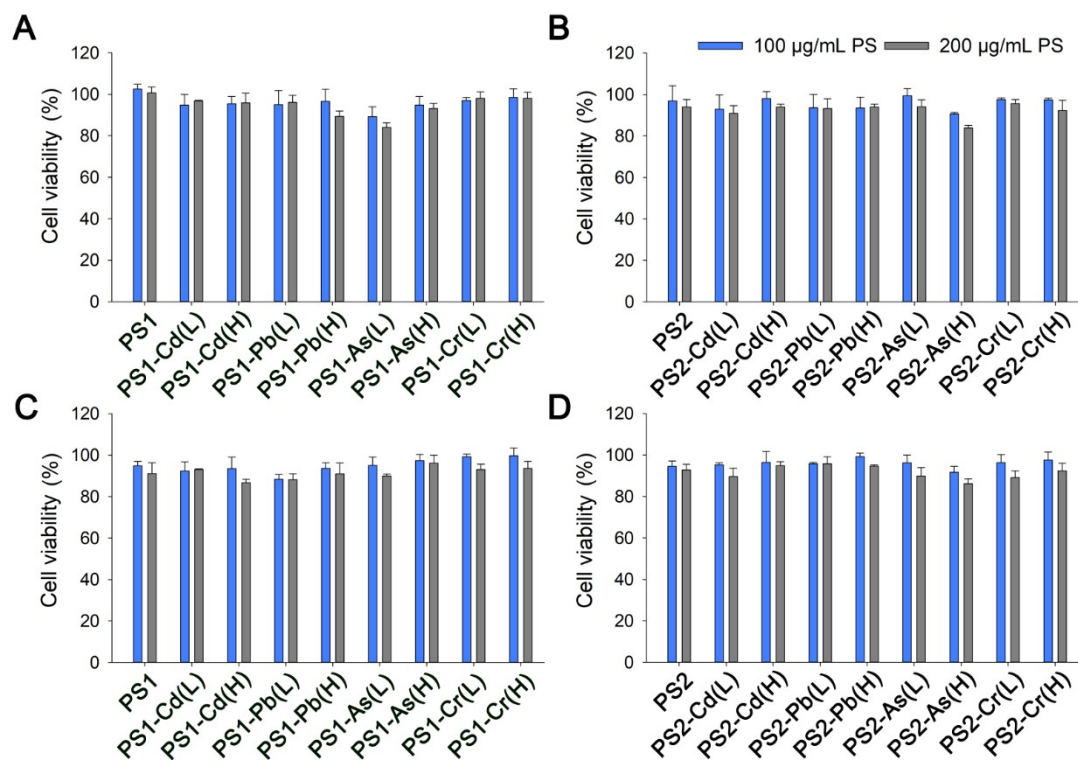

**Fig. S3.** Cell viability (A, B) Caco-2 cells and (C, D) THP-1 macrophages upon exposure to PS NPs or PS-ions. Cells were treated with 100 and 200 µg/mL PS1, PS2, PS1-ions, or PS2-ions for 48 h. No obvious cytotoxicity was observed after exposure to PS-ions in both cell lines (mean ± SD, n = 3).

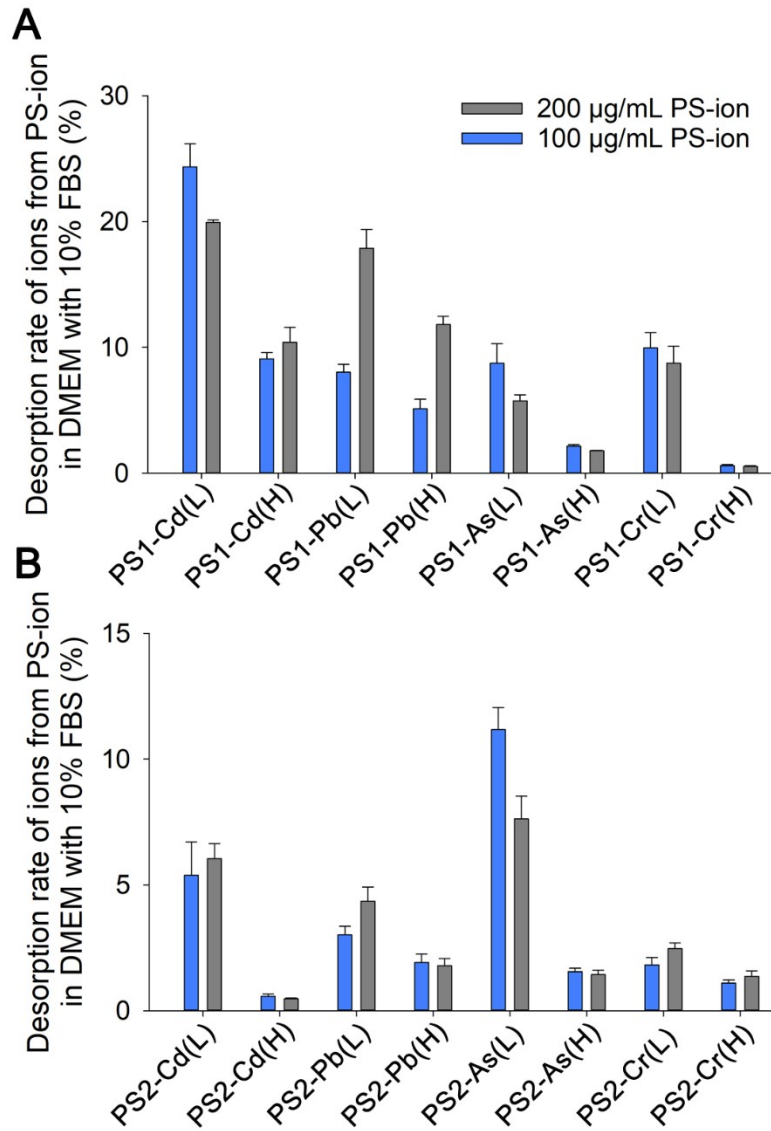

**Fig. S4.** Desorption rates of each ions from 100, 200 µg/mL (A) PS1-ions and (B) PS2-ions in DMEM with 10% FBS for 48 h (mean ± SD, n = 3). The desorption concentrations of Cd<sup>2+</sup>, Pb<sup>2+</sup>, As(III), and Cr(VI) in 200 µg/mL PS1-ions(H) were 45, 150, 10, and 15 ng/mL, respectively.

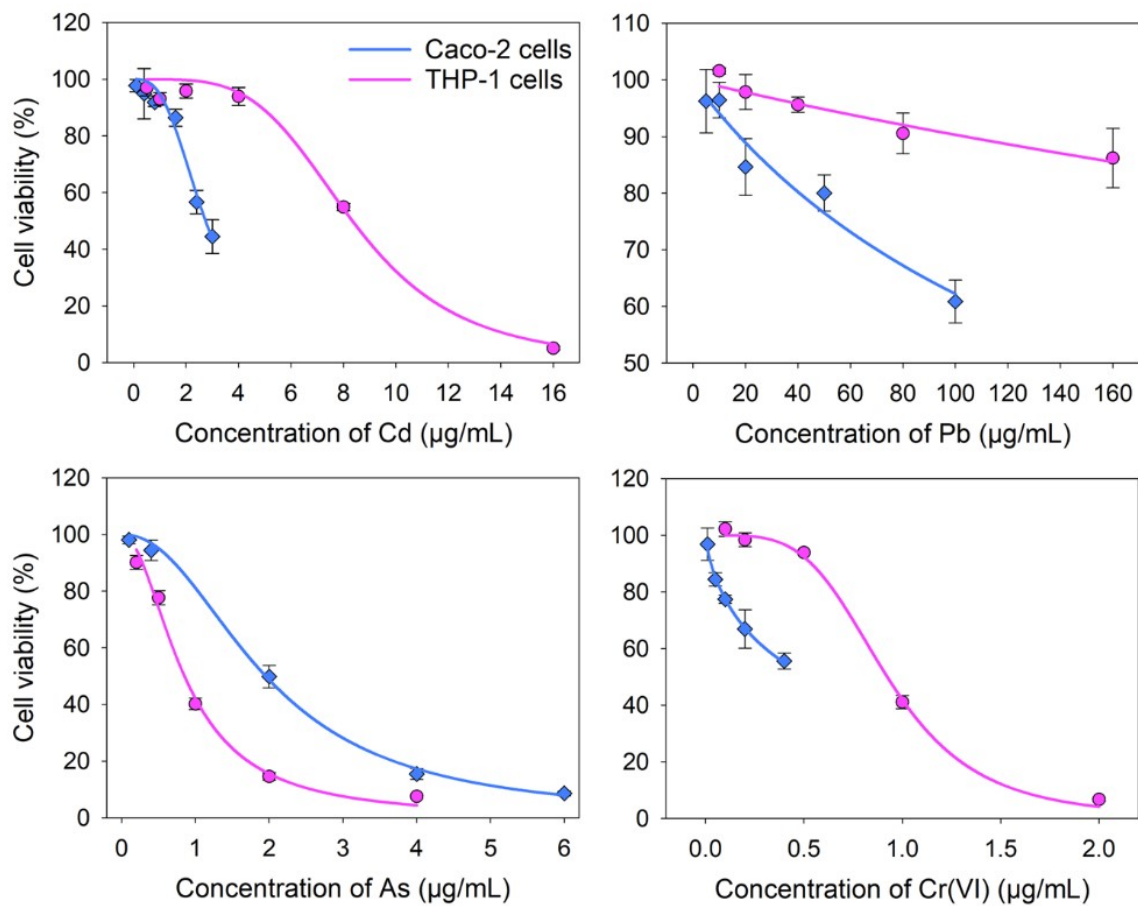

**Fig. S5.** Cell viability of Caco-2 and THP-1 macrophages exposed to  $\text{Cd}^{2+}$ ,  $\text{Pb}^{2+}$ , As(III), and Cr(VI) with various concentrations for 48 h.

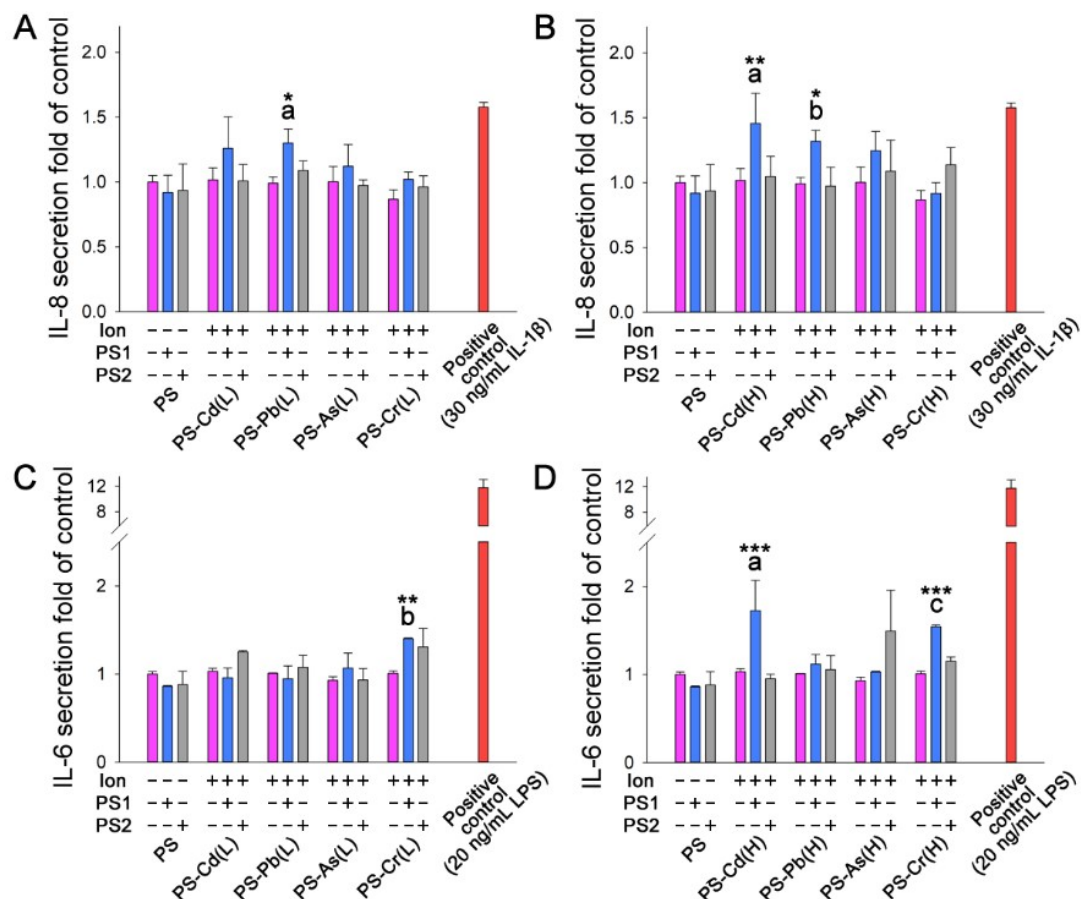

**Fig. S6.** Combined effects of PS-ions on the secretion of inflammatory cytokines. IL-8 secretion in Caco-2 cells exposed to 100 µg/mL (A) PS-ion(L) and (B) PS-ion(H) for 48 h. IL-6 secretion in THP-1 macrophages induced by 100 µg/mL (C) PS-ion (L) and (D) PS-ion (H) for 48 h. The concentrations of individual ions for Pb<sup>2+</sup>, Cd<sup>2+</sup>, As(III), and Cr(VI) were 45, 150, 10, and 15 ng/mL. \*, \*\*, and \*\*\* indicate statistically significant differences compared to PS controls and a, b, and c represent statistically significant differences from corresponding ions (\*a, \*\*b, and \*\*\*c show P < 0.05, P < 0.01, and P < 0.001, respectively. Mean ± SD, n = 3).

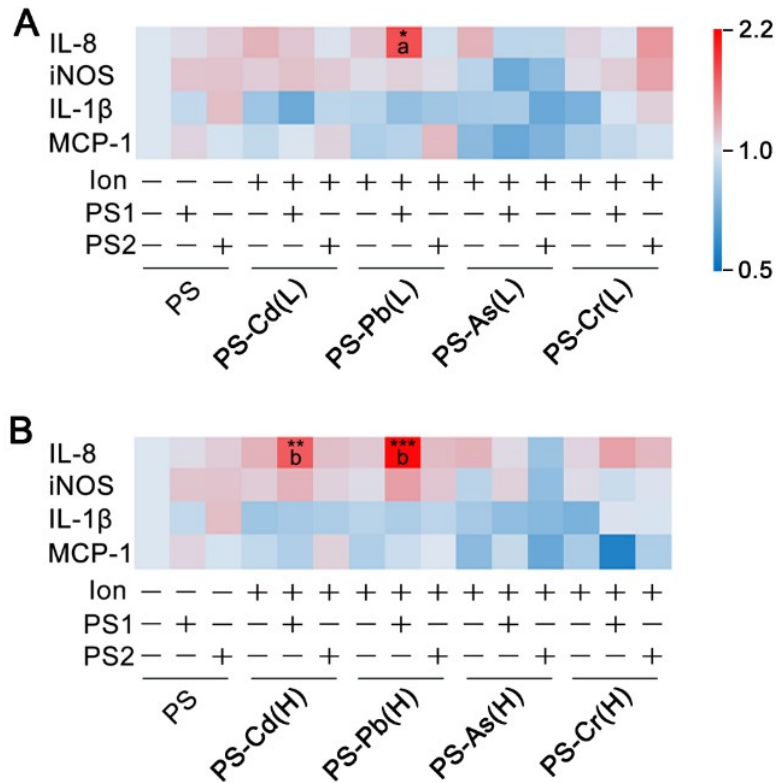

**Fig. S7.** Gene expression of inflammatory cytokines in Caco-2 cells exposed to 100  $\mu\text{g/mL}$  PS-ions for 48 h. Heat map of mRNA levels for IL-8, iNOS, IL-1 $\beta$ , MCP-1 after the exposure to (A) PS-ion(L) and (B) PS-ion(H). The gene expression is determined by qPCR and fold changes were normalized to negative control. \*, \*\*, and \*\*\* indicate statistically significant differences compared to PS controls and a, b, and c represent statistically significant differences from corresponding ions (\*a, \*\*/b, and \*\*\*/c show  $P < 0.05$ ,  $P < 0.01$ , and  $P < 0.001$ , respectively. Mean  $\pm$  SD,  $n = 4$ ).



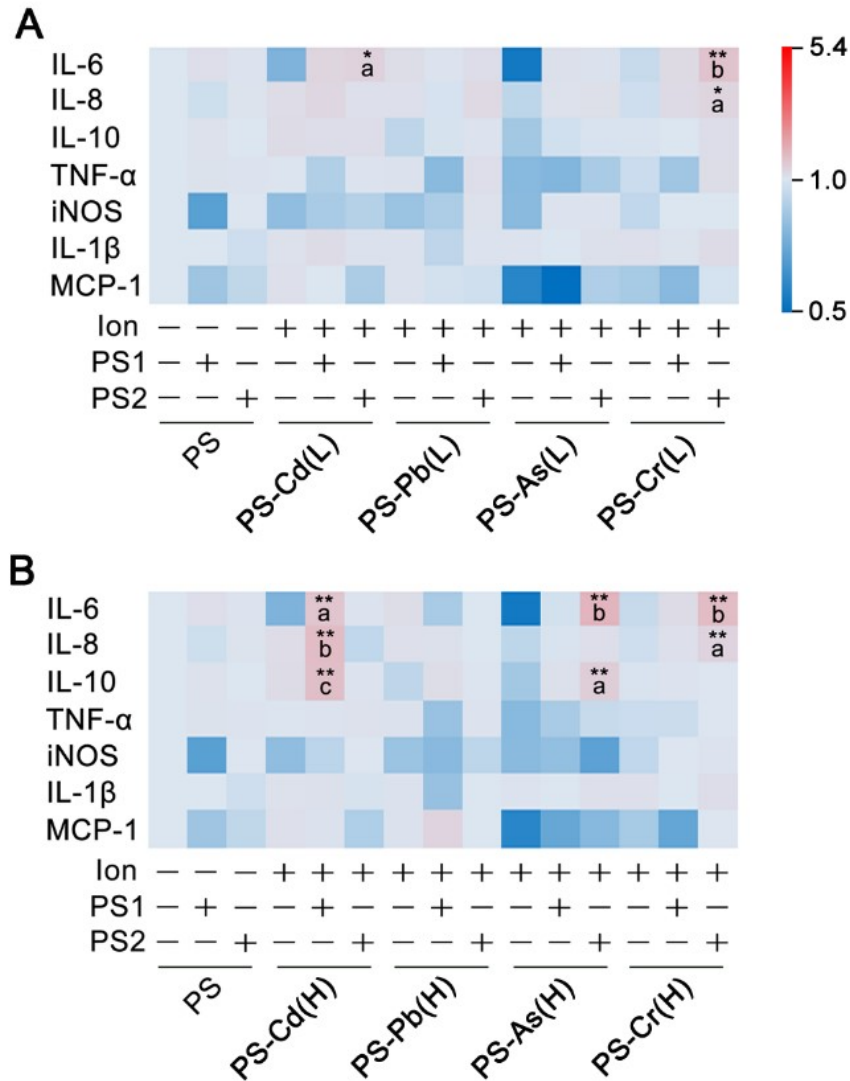

**Fig. S8.** Gene expression of inflammatory cytokines in THP-1 macrophages exposed to 100  $\mu\text{g/mL}$  PS-ion for 48 h. Heat map of mRNA levels for IL-6, IL-8, IL-10, TNF- $\alpha$ , iNOS, IL-1 $\beta$ , MCP-1 after the exposure to (A) PS-ion(L) and (B) PS-ion(H). The gene expression is determined by qPCR and fold changes were normalized to negative control. \*, \*\*, and \*\*\* indicate statistically significant differences compared to PS controls and a, b, and c represent statistically significant differences from corresponding ions (\* / a, \*\* / b, and \*\*\* / c show  $P < 0.05$ ,  $P < 0.01$ , and  $P < 0.001$ , respectively. Mean  $\pm$  SD,  $n = 4$ ).

**Table S1** Sequences of genes analyzed by qPCR

| Gene           | Forward 5'-3' primer     | Reverse 5'-3' primer      |
|----------------|--------------------------|---------------------------|
| IL-8           | ATGACTTCCAAGCTGGCCGTGGCT | TCTCAGCCCTCTTCAAAAAGTTCTC |
| iNOS           | AGGGATTTTAACTTGCAGGTCC   | AGGAGCCGTAATATTGGTTGACA   |
| IL-1 $\beta$   | AGCTGGAGAGTGTAGATCCCAA   | TGTTTTCTGCTTGAGAGGTGCT    |
| MCP-1          | CAGCCAGATGCAATCAATGCC    | TGGAATCCTGAACCCACTTCT     |
| IL-6           | GAAAGCAGCAAAGAGGCACT     | TTTCACCAGGCAAGTCTCCT      |
| IL-10          | GTGATGCCCAAGCTGAGA       | CACGGCCTTGCTCTTGTTTT      |
| TNF- $\alpha$  | TCTTCTCGAACCCCGAGTGAC    | GGTACAGGCCCTCTGATGGC      |
| $\beta$ -actin | TTTTAGGATGGCAAGGGACTT    | GATGAGATTGGCATGGCTTTA     |
| GAPDH          | ATCACCATCTTCCAGGAGCGA    | CCTTCTCCATGGTGGTGAAGAC    |

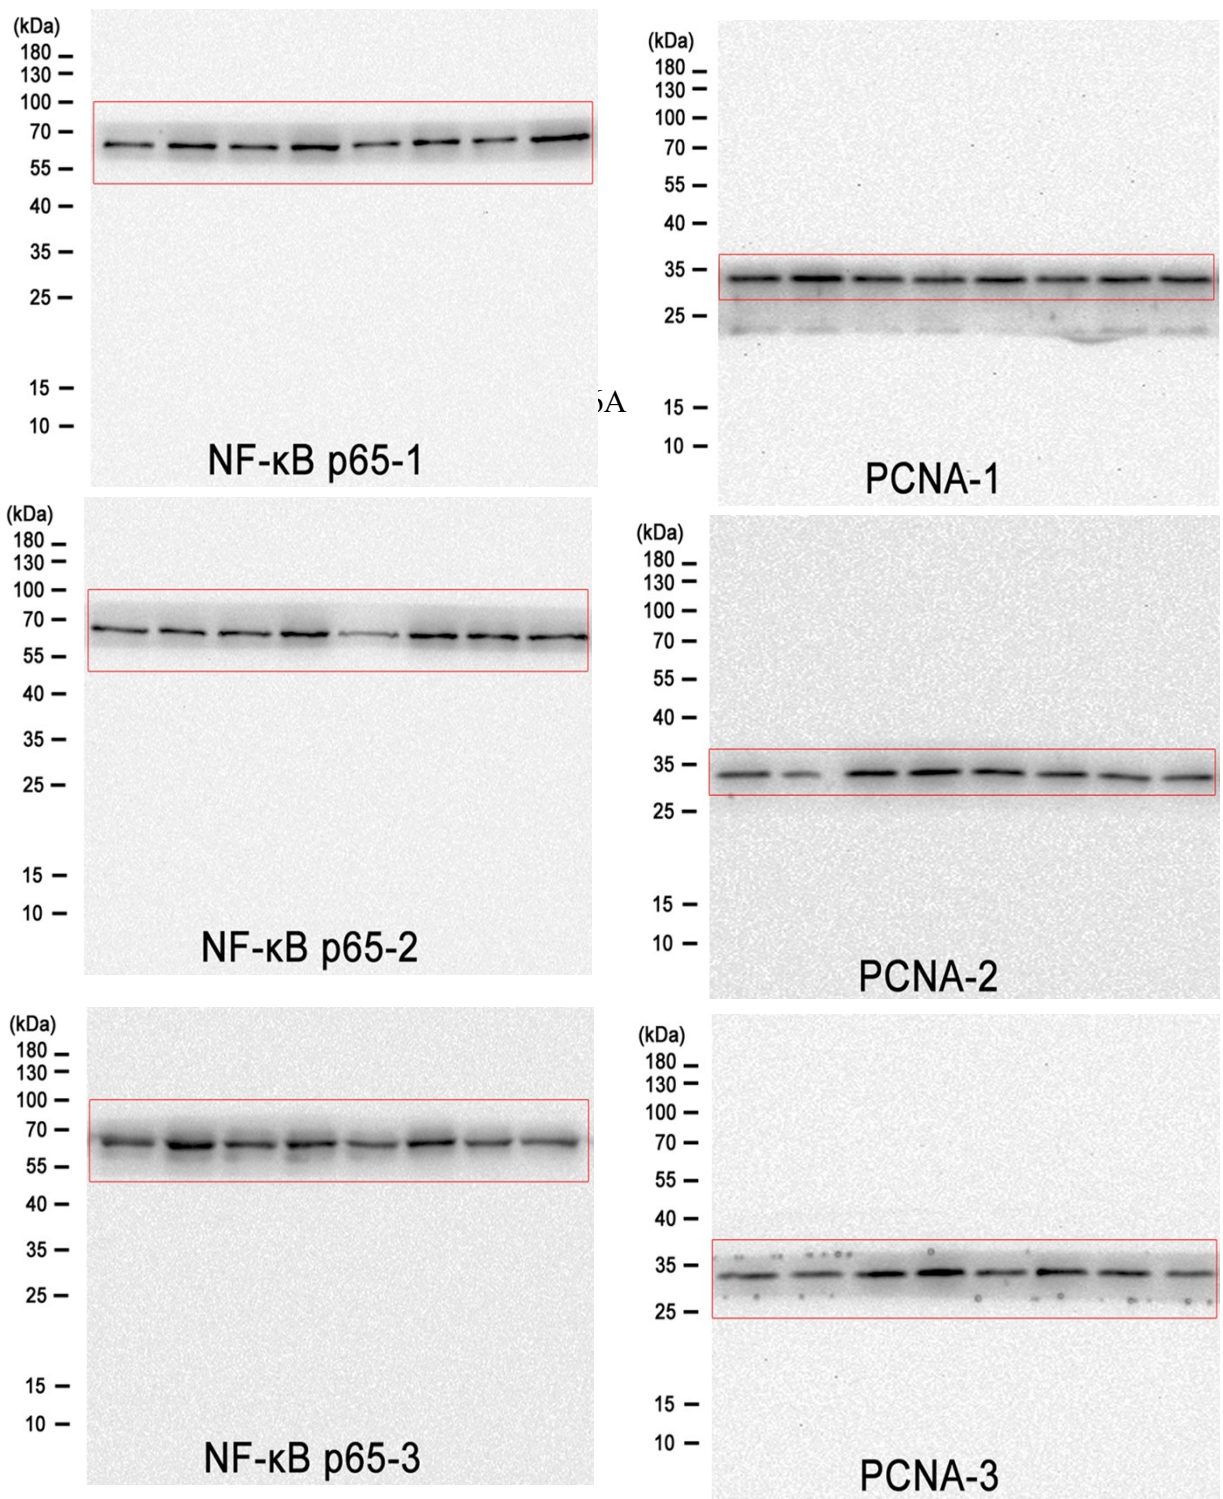

**Fig S9** Full Western Blot data for Figure 6A

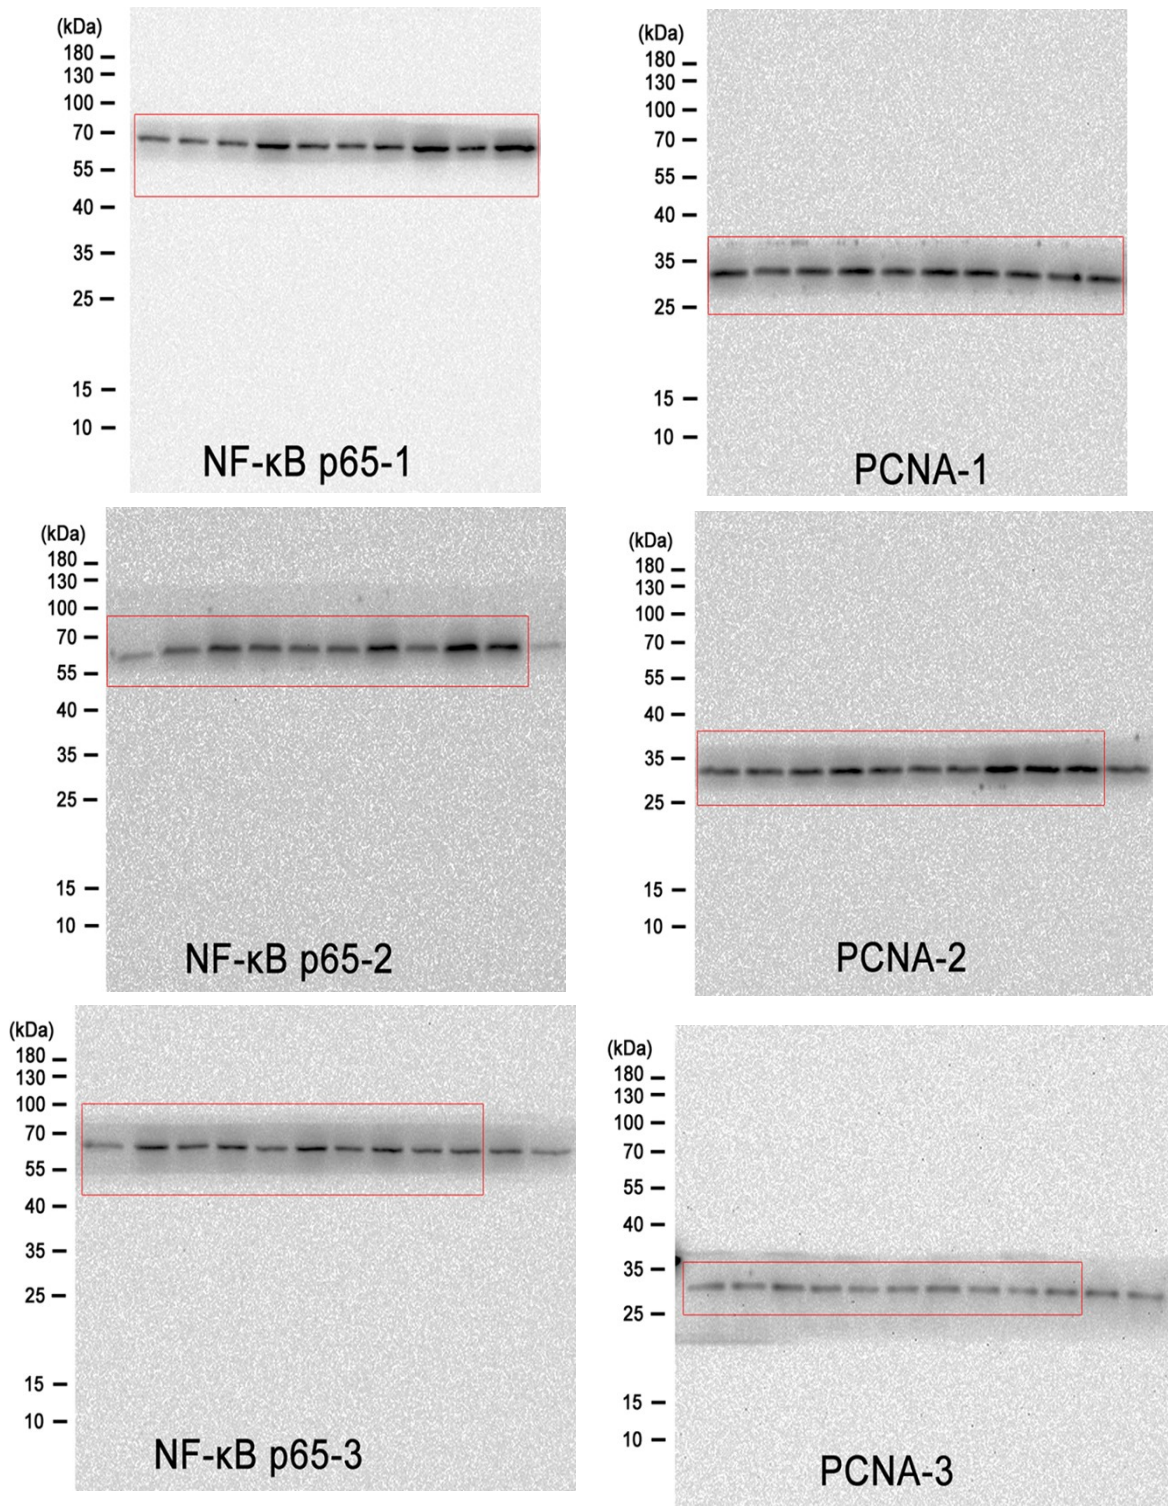

**Fig S10** Full Western Blot data for Figure 6B

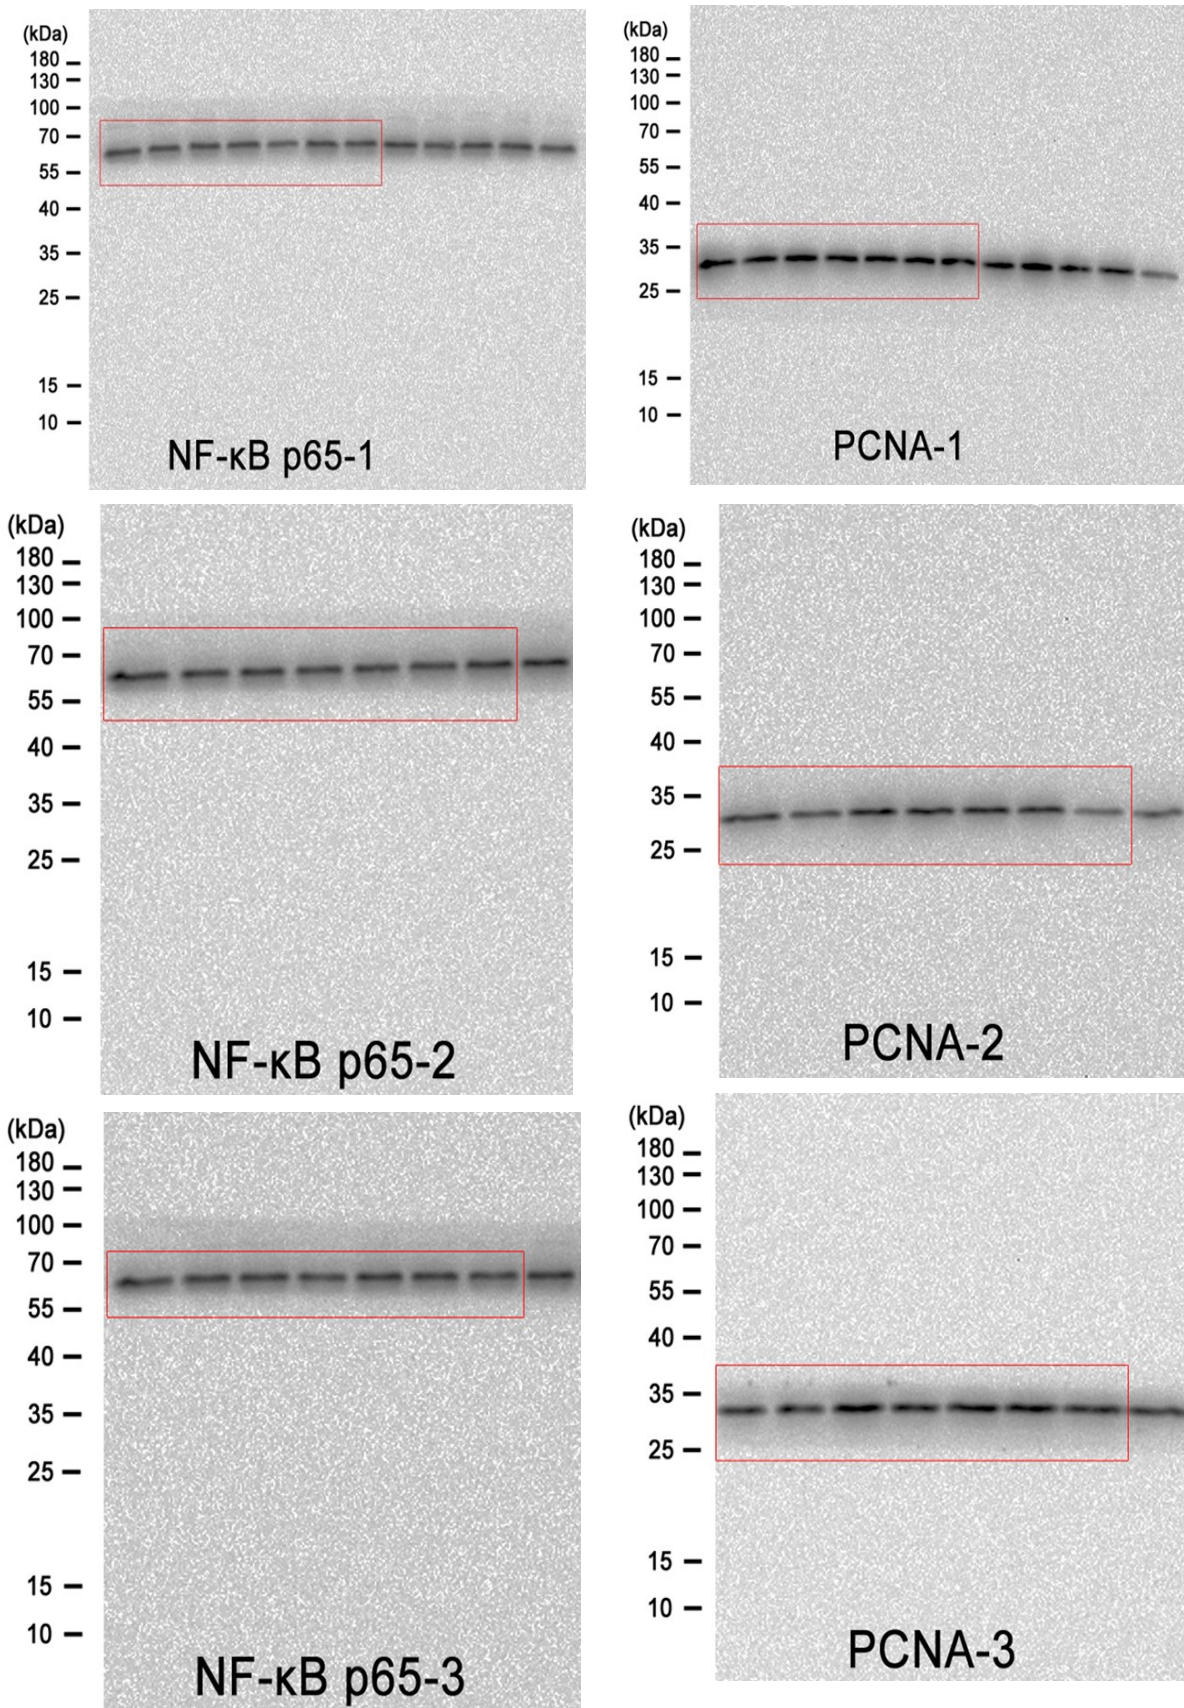

Fig S11 Full Western Blot data for Figure 7A

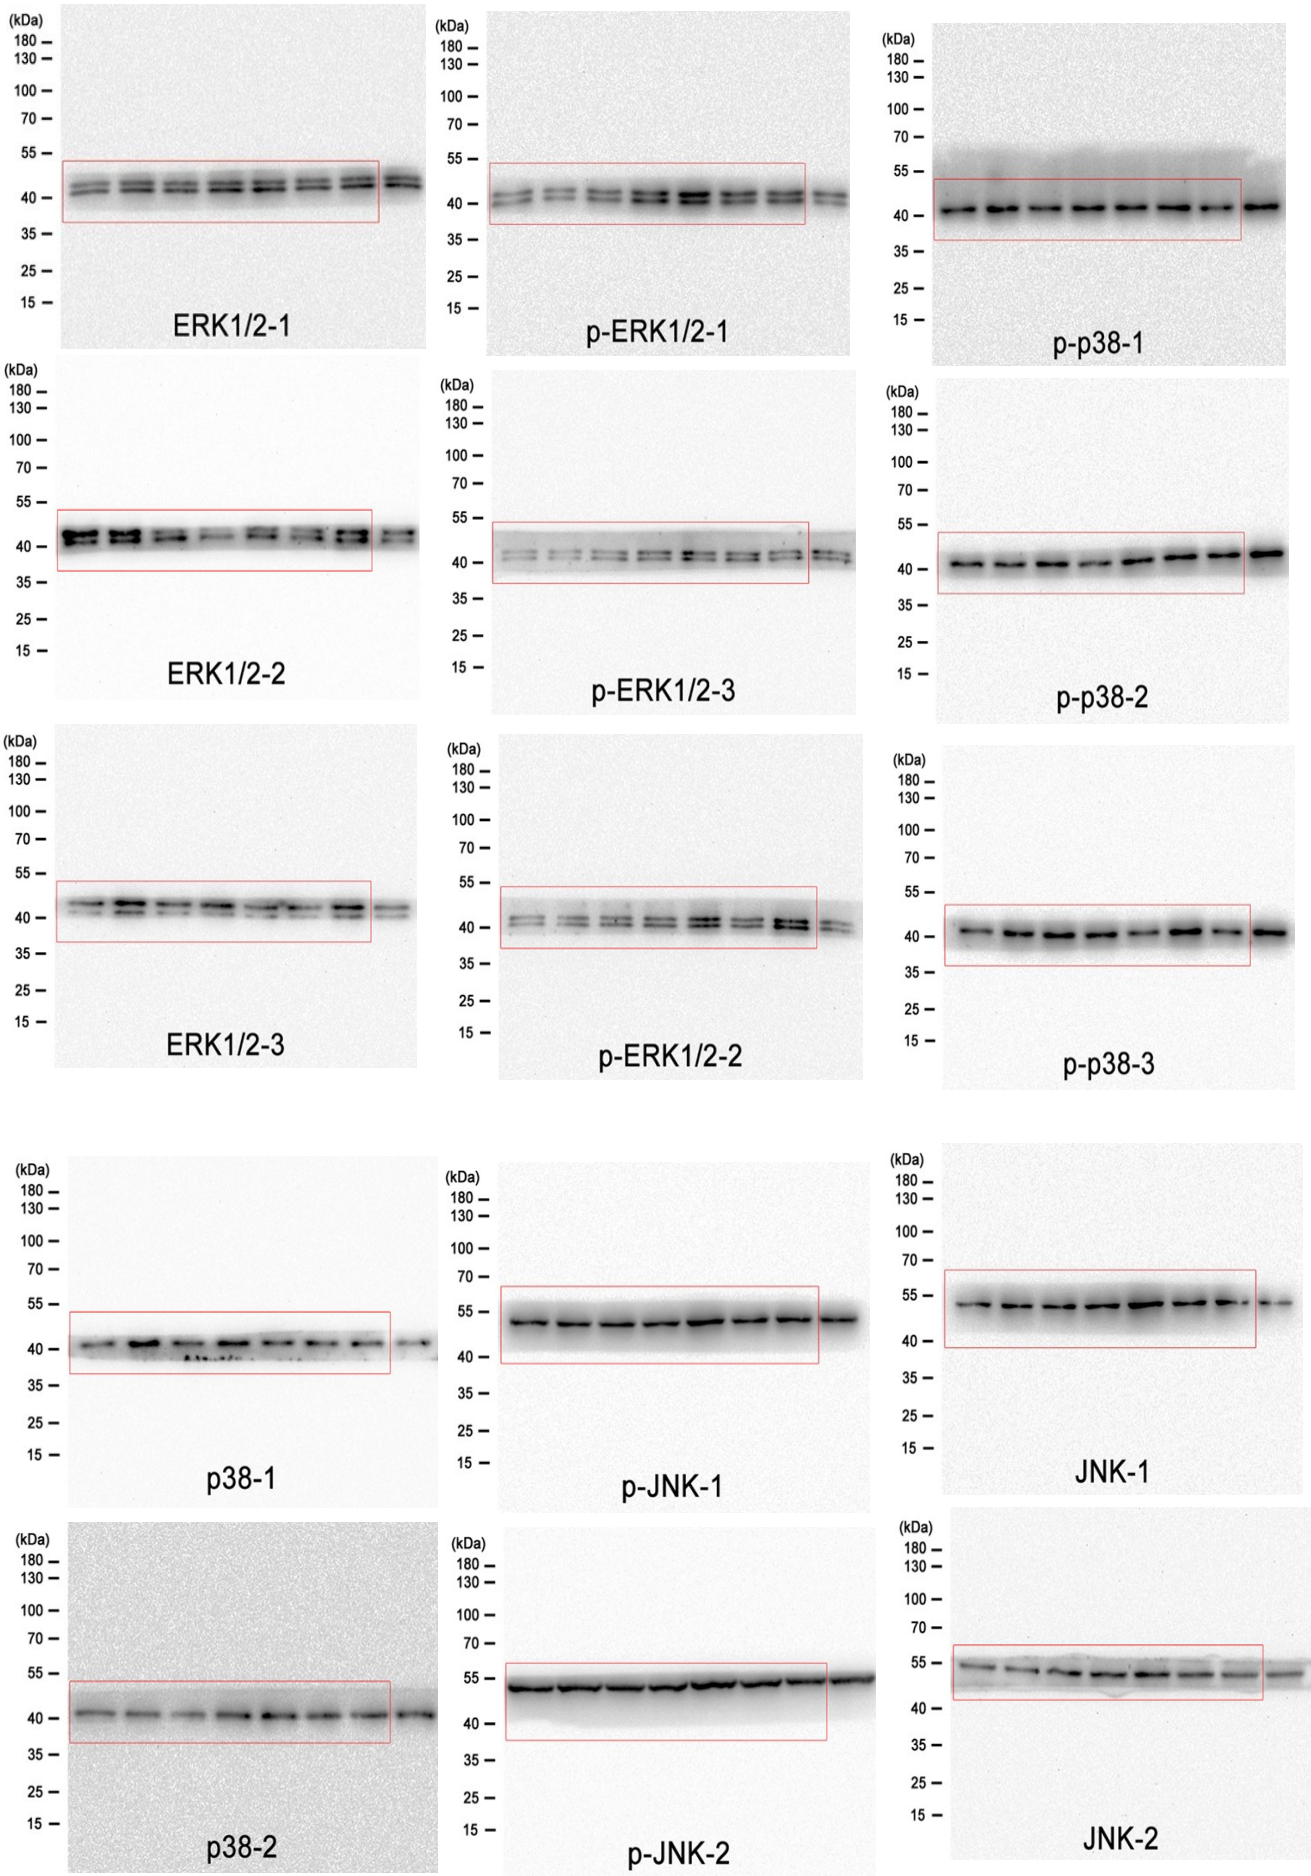

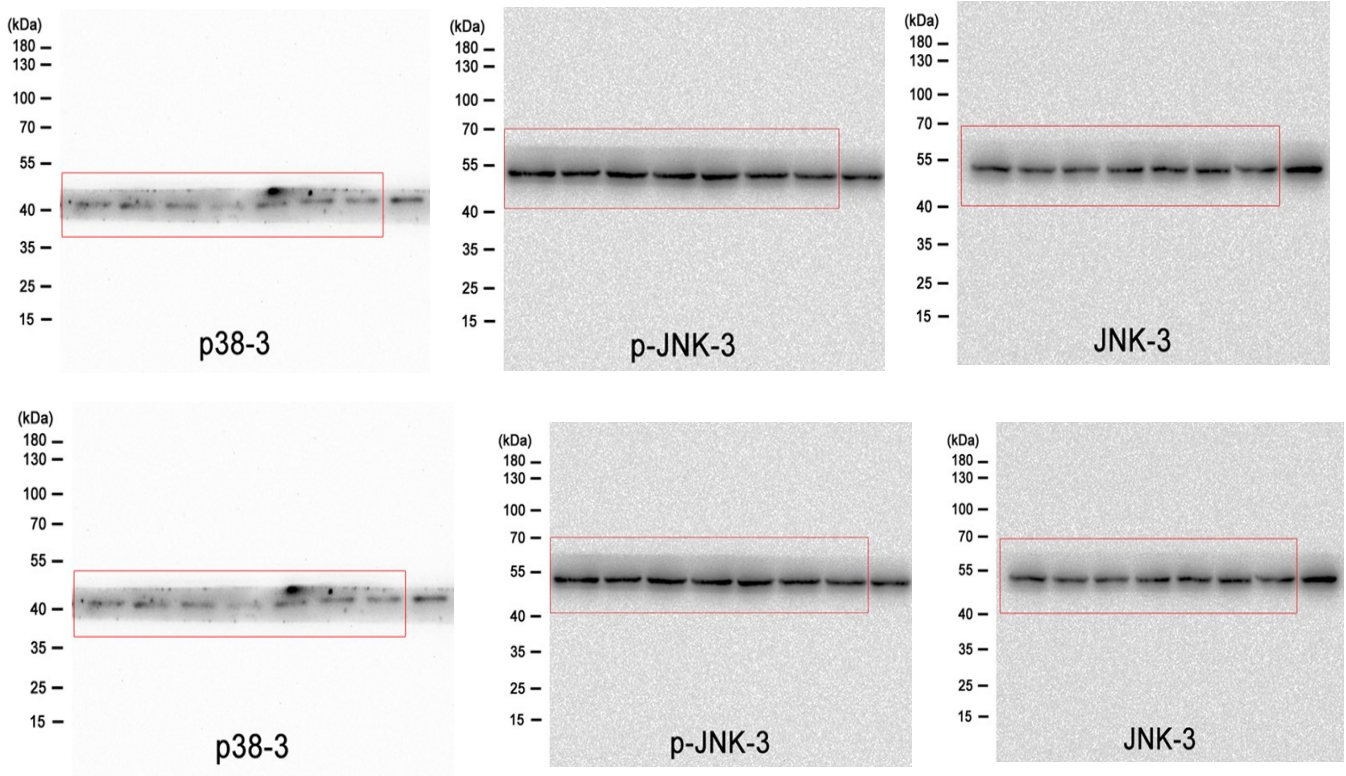

**Fig S12** Full Western Blot data for Figure 7B
